# Supplementary material for: Exploring the Molecular Mechanisms of Macrolide Resistance in Laboratory Mutant Helicobacter pylori
Source: MDPI journal article supplement (doi:10.3390/antibiotics13050396), 2024-04-26
Supplement: s1 [file s1]

# Supplementary Materials

## Exploring the Molecular Mechanisms of Macrolide Resistance in Laboratory Mutant *Helicobacter pylori*

Meltem AYAŞ<sup>1,2\*</sup>, Sinem ÖKTEM OKULLU<sup>3</sup>, Orhan ÖZCAN<sup>4</sup>, Tanıl KOCAGÖZ<sup>2,3</sup>, Yeşim GÜROL<sup>3</sup>

<sup>1</sup> Department of Medical Laboratory Techniques, Vocational School of Health Services, Acibadem Mehmet Ali Aydınlar University, Istanbul, Turkey; [meltem.ayas@acibadem.edu.tr](mailto:meltem.ayas@acibadem.edu.tr).

<sup>2</sup> Department of Medical Biotechnology, Institute of Health Sciences, Acibadem Mehmet Ali Aydınlar University, Istanbul, Turkey; [tanilkocagoz@gmail.com](mailto:tanilkocagoz@gmail.com).

<sup>3</sup> Department of Medical Microbiology, Faculty of Medicine, Acibadem Mehmet Ali Aydınlar University, Istanbul, Turkey; [sinem.oktem@acibadem.edu.tr](mailto:sinem.oktem@acibadem.edu.tr) , [yesim.gurol@acibadem.edu.tr](mailto:yesim.gurol@acibadem.edu.tr).

<sup>4</sup> TrioScience Biotechnology, Istanbul, Turkey; [orhn.ozcn@hotmail.com](mailto:orhn.ozcn@hotmail.com).

\* Correspondence: [meltem.ayas@acibadem.edu.tr](mailto:meltem.ayas@acibadem.edu.tr)

**Table S1.** The combined bioinformatics analysis results of *H. pylori* G27 and Mutant-1 whole genome data.

| CHROM             | POS    | REF | ALT         | Codes For                                      | Gene             | aa change        |
|-------------------|--------|-----|-------------|------------------------------------------------|------------------|------------------|
| NC_011333_G27     | 7125   | GT  | G           | NA(non-coding region)                          | NA               | NA               |
| NC_011333_Mutant1 | 7125   | GT  | G           | NA                                             | NA               | NA               |
| NC_011333_Mutant1 | 20317  | C   | CTTTAATTAAG | NA                                             | NA               | NA               |
| NC_011333_G27     | 74846  | T   | TA          | urease accessory protein UreF CDS              | Pseudogene       | Not a pseudogene |
| NC_011333_Mutant1 | 74846  | T   | TA          | urease accessory protein UreF CDS              | Pseudogene       | Not a pseudogene |
| NC_011333_G27     | 156870 | A   | AT          | hypothetical protein CDS                       | Pseudogene       | Not a pseudogene |
| NC_011333_Mutant1 | 156870 | A   | AT          | hypothetical protein CDS                       | Pseudogene       | Not a pseudogene |
| NC_011333_G27     | 204054 | T   | TG          | hypothetical protein CDS                       | Pseudogene       | Not a pseudogene |
| NC_011333_Mutant1 | 204054 | T   | TG          | hypothetical protein CDS                       | Pseudogene       | Not a pseudogene |
| NC_011333_Mutant1 | 210816 | G   | GT          | NA(non-coding region)                          | NA               | NA               |
| NC_011333_G27     | 232310 | G   | GA          | NA(non-coding region)                          | NA               | NA               |
| NC_011333_Mutant1 | 232310 | G   | GA          | NA(non-coding region)                          | NA               | NA               |
| NC_011333_G27     | 277049 | A   | AT          | hypothetical protein CDS                       | Pseudogene       | Not a pseudogene |
| NC_011333_Mutant1 | 277049 | A   | AT          | hypothetical protein CDS                       | Pseudogene       | Not a pseudogene |
| NC_011333_G27     | 277872 | C   | CA          | hypothetical protein CDS                       | Pseudogene       | Not a pseudogene |
| NC_011333_Mutant1 | 277872 | C   | CA          | hypothetical protein CDS                       | Pseudogene       | Not a pseudogene |
| NC_011333_G27     | 331419 | G   | GT          | NA(non-coding region)                          | NA               | NA               |
| NC_011333_G27     | 334159 | CT  | C           | tatA gene                                      | Pseudogene       | Not a pseudogene |
| NC_011333_Mutant1 | 334159 | CT  | C           | tatA gene                                      | Pseudogene       | Not a pseudogene |
| NC_011333_Mutant1 | 355249 | CAA | C           | NA(non-coding region)                          | NA               | NA               |
| NC_011333_G27     | 401117 | T   | TG          | hypothetical protein CDS                       | Pseudogene       | Not a pseudogene |
| NC_011333_Mutant1 | 401117 | T   | TG          | hypothetical protein CDS                       | Pseudogene       | Not a pseudogene |
| NC_011333_G27     | 431781 | A   | AT          | helix-turn-helix transcriptional regulator CDS | Pseudogene       | Not a pseudogene |
| NC_011333_Mutant1 | 431781 | A   | AT          | helix-turn-helix transcriptional regulator CDS | Pseudogene       | Not a pseudogene |
| NC_011333_G27     | 433755 | A   | AG          | outer membrane family protein CDS              | Pseudogene       | Not a pseudogene |
| NC_011333_Mutant1 | 433755 | A   | AG          | outer membrane family protein CDS              | Pseudogene       | Not a pseudogene |
| NC_011333_G27     | 441037 | C   | CT          | pgsA gene                                      | Pseudogene       | Not a pseudogene |
| NC_011333_Mutant1 | 441037 | C   | CT          | pgsA gene                                      | Pseudogene       | Not a pseudogene |
| NC_011333_G27     | 507732 | C   | CT          | NA(non-coding region)                          | NA               | NA               |
| NC_011333_Mutant1 | 507732 | C   | CT          | NA(non-coding region)                          | NA               | NA               |
| NC_011333_G27     | 508421 | A   | AC          | NA(non-coding region)                          | NA               | NA               |
| NC_011333_Mutant1 | 508421 | A   | AC          | NA(non-coding region)                          | NA               | NA               |
| NC_011333_G27     | 523568 | G   | GT          | cag pathogenicity island protein CDS           | Pseudogene       | Not a pseudogene |
| NC_011333_Mutant1 | 523568 | G   | GT          | cag pathogenicity island protein CDS           | Pseudogene       | Not a pseudogene |
| NC_011333_G27     | 551897 | G   | GT          | CagA                                           |                  |                  |
| NC_011333_Mutant1 | 551897 | G   | GT          | CagA                                           |                  |                  |
| NC_011333_G27     | 555760 | G   | GA          | rsmI gene                                      | Pseudogene       | Not a pseudogene |
| NC_011333_Mutant1 | 555760 | G   | GA          | rsmI gene                                      | Pseudogene       | Not a pseudogene |
| NC_011333_G27     | 566958 | A   | AT          | NA(non-coding region)                          | NA               | NA               |
| NC_011333_Mutant1 | 566958 | A   | AT          | NA(non-coding region)                          | NA               | NA               |
| NC_011333_G27     | 581541 | CT  | C           | energy transducer TonB CDS                     | Pseudogene       | Not a pseudogene |
| NC_011333_Mutant1 | 581541 | CT  | C           | energy transducer TonB CDS                     | Pseudogene       | Not a pseudogene |
| NC_011333_G27     | 581557 | CT  | C           | energy transducer TonB CDS                     | Pseudogene       | Not a pseudogene |
| NC_011333_Mutant1 | 581557 | CT  | C           | energy transducer TonB CDS                     | Pseudogene       | Not a pseudogene |
| NC_011333_G27     | 581570 | CT  | C           | energy transducer TonB CDS                     | Pseudogene       | Not a pseudogene |
| NC_011333_Mutant1 | 581570 | CT  | C           | energy transducer TonB CDS                     | Pseudogene       | Not a pseudogene |
| NC_011333_Mutant1 | 657913 | G   | GC          | NA(non-coding region)                          | NA               | NA               |
| NC_011333_Mutant1 | 694384 | A   | G           | sulfite exporter TauE/Safe family protein CDS  | sulfite exporter | L>P              |

| CHROM             | POS     | REF                                                                                                                                                                                                                                                                       | ALT | Codes For                | Gene                                                                                     | aa change                                       |
|-------------------|---------|---------------------------------------------------------------------------------------------------------------------------------------------------------------------------------------------------------------------------------------------------------------------------|-----|--------------------------|------------------------------------------------------------------------------------------|-------------------------------------------------|
| NC_011333_G27     | 725944  | T                                                                                                                                                                                                                                                                         | TA  | uvrA                     | Pseudogene                                                                               | Not a pseudogene                                |
| NC_011333_Mutant1 | 725944  | T                                                                                                                                                                                                                                                                         | TA  | uvrA                     | Pseudogene                                                                               | Not a pseudogene                                |
| NC_011333_G27     | 739196  | CG                                                                                                                                                                                                                                                                        | C   | DNA polymeras            | Pseudogene                                                                               | Not a pseudogene                                |
| NC_011333_Mutant1 | 739196  | CG                                                                                                                                                                                                                                                                        | C   | DNA polymeras            | Pseudogene                                                                               | Not a pseudogene                                |
| NC_011333_Mutant1 | 748242  | CAA                                                                                                                                                                                                                                                                       | C   | NA(non-coding)           | NA                                                                                       | NA                                              |
| NC_011333_Mutant1 | 758373  | C                                                                                                                                                                                                                                                                         | CA  | NA(non-coding)           | NA                                                                                       | NA                                              |
| NC_011333_Mutant1 | 834623  | CTT                                                                                                                                                                                                                                                                       | C   | NA(non-coding)           | NA                                                                                       | NA                                              |
| NC_011333_G27     | 936640  | C                                                                                                                                                                                                                                                                         | CA  | NA(non-coding)           | NA                                                                                       | NA                                              |
| NC_011333_G27     | 1028566 | A                                                                                                                                                                                                                                                                         | G   | hypothetical protein CDS |                                                                                          | huge frameshift                                 |
| NC_011333_G27     | 1208733 | CA                                                                                                                                                                                                                                                                        | C   | hopl CDS                 | Pseudogene                                                                               | Not a pseudogene                                |
| NC_011333_Mutant1 | 1208733 | CA                                                                                                                                                                                                                                                                        | C   | hopl CDS                 | Pseudogene                                                                               | Not a pseudogene                                |
| NC_011333_G27     | 1228406 | CA                                                                                                                                                                                                                                                                        | C   | NA(non-coding)           | NA                                                                                       | NA                                              |
| NC_011333_Mutant1 | 1228406 | CA                                                                                                                                                                                                                                                                        | C   | NA(non-coding)           | NA                                                                                       | NA                                              |
| NC_011333_G27     | 1228626 | A                                                                                                                                                                                                                                                                         | AT  | NA(non-coding)           | NA                                                                                       | NA                                              |
| NC_011333_Mutant1 | 1228626 | A                                                                                                                                                                                                                                                                         | AT  | NA(non-coding)           | NA                                                                                       | NA                                              |
| NC_011333_Mutant1 | 1242247 | T                                                                                                                                                                                                                                                                         | C   | DUF874 family            | primary mutation disrupt gene than secondary mutations make gene not becoming psuedogene | TNQTTHQPKHLPNSKQPSQR aa changes in final mutant |
| NC_011333_Mutant1 | 1242249 | G                                                                                                                                                                                                                                                                         | A   |                          |                                                                                          | TNQTTTQPKHLPNSKQPHSQR aas in reference G27      |
| NC_011333_Mutant1 | 1242264 | G                                                                                                                                                                                                                                                                         | T   |                          |                                                                                          |                                                 |
| NC_011333_Mutant1 | 1242283 | G                                                                                                                                                                                                                                                                         | A   |                          |                                                                                          |                                                 |
| NC_011333_Mutant1 | 1242287 | T                                                                                                                                                                                                                                                                         | G   |                          |                                                                                          |                                                 |
| NC_011333_Mutant1 | 1251303 | TAGGTTTTGGCGTCTTTTATCTTTGTGAGCCACTAATTGAGAGCTTAACTCAGGTTTTTTGGCGTCTTTTATCTTTGTGAGCCACTAATTGAGAGCTAACTCAGGTTTTTTGGCGTCTTTTATCTTTGTGAGCCACTAATTGAGAGCTAACTCAGGTTTTTTGGCGTCTTTTATCTTTGTGAGCCACTAATTGAGAGCTTA<br>ACTCAGGTTTTTTGGCGTCTTTTATCTTTGTGAGCCACTAAT<br>TGAGAGCTTAACTC | T   | hypothetical pro         | loss of a gene                                                                           |                                                 |
| NC_011333_G27     | 1265037 | C                                                                                                                                                                                                                                                                         | CA  | Name: DNA-dir            | Pseudogene                                                                               | Not a pseudogene                                |
| NC_011333_Mutant1 | 1265037 | C                                                                                                                                                                                                                                                                         | CA  | Name: DNA-dir            | Pseudogene                                                                               | Not a pseudogene                                |
| NC_011333_G27     | 1304662 | A                                                                                                                                                                                                                                                                         | AT  | alaS CDS                 | Pseudogene                                                                               | Not a pseudogene                                |
| NC_011333_Mutant1 | 1304662 | A                                                                                                                                                                                                                                                                         | AT  | alaS CDS                 | Pseudogene                                                                               | Not a pseudogene                                |
| NC_011333_G27     | 1305908 | CT                                                                                                                                                                                                                                                                        | C   | babB CDS                 | Pseudogene                                                                               | Not a pseudogene                                |
| NC_011333_Mutant1 | 1305908 | CT                                                                                                                                                                                                                                                                        | C   | babB CDS                 | Pseudogene                                                                               | Not a pseudogene                                |
| NC_011333_G27     | 1333420 | TA                                                                                                                                                                                                                                                                        | T   | NADH-quinone             | Pseudogene                                                                               | Not a pseudogene                                |
| NC_011333_Mutant1 | 1333420 | TA                                                                                                                                                                                                                                                                        | T   | NADH-quinone             | Pseudogene                                                                               | Not a pseudogene                                |
| NC_011333_G27     | 1333463 | GC                                                                                                                                                                                                                                                                        | G   | NADH-quinone             | Pseudogene                                                                               | Not a pseudogene                                |
| NC_011333_Mutant1 | 1333463 | GC                                                                                                                                                                                                                                                                        | G   | NADH-quinone             | Pseudogene                                                                               | Not a pseudogene                                |
| NC_011333_G27     | 1333524 | AT                                                                                                                                                                                                                                                                        | A   | NADH-quinone             | Pseudogene                                                                               | Not a pseudogene                                |
| NC_011333_Mutant1 | 1333524 | AT                                                                                                                                                                                                                                                                        | A   | NADH-quinone             | Pseudogene                                                                               | Not a pseudogene                                |
| NC_011333_G27     | 1359849 | A                                                                                                                                                                                                                                                                         | AT  | DNA-directed R           | frameshifted at terminal ends                                                            | secondary mutation corrects error               |
| NC_011333_Mutant1 | 1359849 | A                                                                                                                                                                                                                                                                         | AT  | DNA-directed R           | frameshifted at terminal ends                                                            | secondary mutation corrects error               |
| NC_011333_G27     | 1367919 | GT                                                                                                                                                                                                                                                                        | G   | NA(non-coding)           | NA                                                                                       | NA                                              |
| NC_011333_Mutant1 | 1367919 | GT                                                                                                                                                                                                                                                                        | G   | NA(non-coding)           | NA                                                                                       | NA                                              |
| NC_011333_Mutant1 | 1392764 | C                                                                                                                                                                                                                                                                         | CA  | NA(non-coding)           | NA                                                                                       | NA                                              |
| NC_011333_G27     | 1410928 | TA                                                                                                                                                                                                                                                                        | T   | 4-hydroxybenzo           | frameshifted at terminal ends                                                            | secondary mutation corrects error               |
| NC_011333_Mutant1 | 1410928 | TA                                                                                                                                                                                                                                                                        | T   | 4-hydroxybenzo           | frameshifted at terminal ends                                                            | secondary mutation corrects error               |
| NC_011333_G27     | 1428286 | G                                                                                                                                                                                                                                                                         | GA  | flhW CDS                 | frameshifted at terminal ends                                                            | secondary mutation corrects error               |
| NC_011333_Mutant1 | 1428286 | G                                                                                                                                                                                                                                                                         | GA  | flhW CDS                 | frameshifted at terminal ends                                                            | secondary mutation corrects error               |
| NC_011333_G27     | 1480681 | C                                                                                                                                                                                                                                                                         | CT  | mpa CDS                  | frameshifted at 5' end                                                                   | secondary mutation corrects error               |
| NC_011333_Mutant1 | 1480681 | C                                                                                                                                                                                                                                                                         | CT  | mpa CDS                  | frameshifted at 5' end                                                                   | secondary mutation corrects error               |
| NC_011333_G27     | 1491244 | T                                                                                                                                                                                                                                                                         | TA  | NA(non-coding)           | NA                                                                                       | NA                                              |
| NC_011333_Mutant1 | 1491244 | T                                                                                                                                                                                                                                                                         | TA  | NA(non-coding)           | NA                                                                                       | NA                                              |
| NC_011333_G27     | 1491260 | G                                                                                                                                                                                                                                                                         | GA  | NA(non-coding)           | NA                                                                                       | NA                                              |
| NC_011333_Mutant1 | 1491260 | G                                                                                                                                                                                                                                                                         | GA  | NA(non-coding)           | NA                                                                                       | NA                                              |
| NC_011333_G27     | 1491283 | GA                                                                                                                                                                                                                                                                        | G   | NA(non-coding)           | NA                                                                                       | NA                                              |
| NC_011333_Mutant1 | 1491283 | GA                                                                                                                                                                                                                                                                        | G   | NA(non-coding)           | NA                                                                                       | NA                                              |
| NC_011333_G27     | 1541768 | G                                                                                                                                                                                                                                                                         | GA  | heavy metal tra          | Pseudogene                                                                               | Not a pseudogene                                |
| NC_011333_Mutant1 | 1541768 | G                                                                                                                                                                                                                                                                         | GA  | heavy metal tra          | Pseudogene                                                                               | Not a pseudogene                                |
| NC_011333_G27     | 1568738 | T                                                                                                                                                                                                                                                                         | TA  | outer membran            | Pseudogene                                                                               | Not a pseudogene                                |
| NC_011333_Mutant1 | 1568738 | T                                                                                                                                                                                                                                                                         | TA  | outer membran            | Pseudogene                                                                               | Not a pseudogene                                |
| NC_011333_Mutant1 | 1586573 | CT                                                                                                                                                                                                                                                                        | C   | glycosyltransfer         | in-silico SNP 6T repeat made Illumina sequencing error                                   | NA                                              |
| NC_011333_G27     | 1644852 | AT                                                                                                                                                                                                                                                                        | A   | glycosyltransfer         | in-silico SNP 6T repeat made Illumina sequencing error                                   |                                                 |
|                   |         |                                                                                                                                                                                                                                                                           |     |                          |                                                                                          |                                                 |

Table S2. The combined bioinformatics analysis results of *H. pylori* G27 and Mutant-2 whole genome data

| Position of Polymorphism | Details of Polymorphism                                                                                                                                                                                                                                                                                                                                                                                                                                                                               |
|--------------------------|-------------------------------------------------------------------------------------------------------------------------------------------------------------------------------------------------------------------------------------------------------------------------------------------------------------------------------------------------------------------------------------------------------------------------------------------------------------------------------------------------------|
| 1242247                  | /Reference_Nucleotide(s)="T"<br>/Variant_Nucleotide(s)="C"<br>/Change="T->C"<br>/Polymorphism_Type="Substitution"<br>/Qual="6569.77"<br>/Failed_Filters="PASS"<br>/Allele_count=2<br>/Allele_frequency=1<br>/Number_of_alleles=2<br>/Combined_Depth=150<br>/ExcessHet="3.0103"<br>/FS="0.000"<br>/MLEAC=2<br>/MLEAF=1<br>/Mapping_quality="42.39"<br>/QD="44.09"<br>/SOR="2.046"<br>/Genotype="1/1"<br>/AD="0,149"<br>/Sample_Depth=149<br>/Genotype_Quality=99<br>/PL="6598,448,0"<br>/label="C"     |
| 1242249                  | /Reference_Nucleotide(s)="G"<br>/Variant_Nucleotide(s)="A"<br>/Change="G->A"<br>/Polymorphism_Type="Substitution"<br>/Qual="6569.77"<br>/Failed_Filters="PASS"<br>/Allele_count=2<br>/Allele_frequency=1<br>/Number_of_alleles=2<br>/Combined_Depth=139<br>/ExcessHet="3.0103"<br>/FS="0.000"<br>/MLEAC=2<br>/MLEAF=1<br>/Mapping_quality="40.84"<br>/QD="47.26"<br>/SOR="2.186"<br>/Genotype="1/1"<br>/AD="0,139"<br>/Sample_Depth=139<br>/Genotype_Quality=99<br>/PL="6598,448,0"<br>/label="A"     |
| 1242264                  | /Reference_Nucleotide(s)="G"<br>/Variant_Nucleotide(s)="T"<br>/Change="G->T"<br>/Polymorphism_Type="Substitution"<br>/Qual="5731.77"<br>/Failed_Filters="MQFilter"<br>/Allele_count=2<br>/Allele_frequency=1<br>/Number_of_alleles=2<br>/Combined_Depth=116<br>/ExcessHet="3.0103"<br>/FS="0.000"<br>/MLEAC=2<br>/MLEAF=1<br>/Mapping_quality="38.00"<br>/QD="49.41"<br>/SOR="2.107"<br>/Genotype="1/1"<br>/AD="0,116"<br>/Sample_Depth=116<br>/Genotype_Quality=99<br>/PL="5760,385,0"<br>/label="T" |

Table S2. The combined bioinformatics analysis results of *H. pylori* G27 and Mutant-2 whole genome data(continued)

| Position of Polymorphism | Details of Polymorphism                                                                                                                                                                                                                                                                                                                                                                                                                                                                                                                                                                                  |
|--------------------------|----------------------------------------------------------------------------------------------------------------------------------------------------------------------------------------------------------------------------------------------------------------------------------------------------------------------------------------------------------------------------------------------------------------------------------------------------------------------------------------------------------------------------------------------------------------------------------------------------------|
| 1242283                  | /Reference_Nucleotide(s)="G"<br>/Variant_Nucleotide(s)="A"<br>/Change="G -> A"<br>/Polymorphism_Type="Substitution"<br>/Qual="6050.77"<br>/Failed_Filters="MQFilter"<br>/Allele_count=2<br>/Allele_frequency=1<br>/Number_of_alleles=2<br>/Combined_Depth=126<br>/ExcessHet="3.0103"<br>/FS="0.000"<br>/MLEAC=2<br>/MLEAF=1<br>/Mapping_quality="39.23"<br>/QD="48.02"<br>/SOR="1.953"<br>/Genotype="1/1"<br>/AD="0,126"<br>/Sample_Depth=126<br>/Genotype_Quality=99<br>/PL="6079,412,0"<br>/label="A"                                                                                                  |
| 1242287                  | /Reference_Nucleotide(s)="T"<br>/Variant_Nucleotide(s)="G"<br>/Change="T -> G"<br>/Polymorphism_Type="Substitution"<br>/Qual="5858.77"<br>/Failed_Filters="PASS"<br>/Allele_count=2<br>/Allele_frequency=1<br>/Number_of_alleles=2<br>/Combined_Depth=130<br>/ExcessHet="3.0103"<br>/FS="0.000"<br>/MLEAC=2<br>/MLEAF=1<br>/Mapping_quality="41.54"<br>/QD="45.07"<br>/SOR="2.452"<br>/Genotype="1/1"<br>/AD="0,130"<br>/Sample_Depth=130<br>/Genotype_Quality=99<br>/PL="5887,406,0"<br>/label="G"                                                                                                      |
| 1243410                  | /Reference_Nucleotide(s)="T"<br>/Variant_Nucleotide(s)="C"<br>/Change="T -> C"<br>/Polymorphism_Type="Substitution"<br>/Qual="2804.77"<br>/Failed_Filters="PASS"<br>/Allele_count=1<br>/Allele_frequency="0.5"<br>/Number_of_alleles=2<br>/BaseQRankSum="9.370"<br>/ClippingRankSum="0.000"<br>/Combined_Depth=429<br>/ExcessHet="3.0103"<br>/FS="2.013"<br>/MLEAC=1<br>/MLEAF="0.5"<br>/Mapping_quality="44.72"<br>/MQRankSum="-0.662"<br>/QD="6.54"<br>/ReadPosRankSum="-2.656"<br>/SOR="0.939"<br>/Genotype="0/1"<br>/AD="324,105"<br>/Sample_Depth=429<br>/Genotype_Quality=99<br>/PL="2833,0,10407" |

Table S2. The combined bioinformatics analysis results of *H. pylori* G27 and Mutant-2 whole genome data(continued)

| Position of Polymorphism | Details of Polymorphism                                                                                                                                                                                                                                                                                                                                                                                                                                                                                                                                                                                                   |
|--------------------------|---------------------------------------------------------------------------------------------------------------------------------------------------------------------------------------------------------------------------------------------------------------------------------------------------------------------------------------------------------------------------------------------------------------------------------------------------------------------------------------------------------------------------------------------------------------------------------------------------------------------------|
| 1243461                  | /Reference_Nucleotide(s)="C"<br>/Variant_Nucleotide(s)="T"<br>/Change="C -> T"<br>/Polymorphism_Type="Substitution"<br>/Qual="5134.77"<br>/Failed_Filters="PASS"<br>/Allele_count=1<br>/Allele_frequency="0.5"<br>/Number_of_alleles=2<br>/BaseQRankSum="-10.125"<br>/ClippingRankSum="0.000"<br>/Combined_Depth=693<br>/ExcessHet="3.0103"<br>/FS="4.063"<br>/MLEAC=1<br>/MLEAF="0.5"<br>/Mapping_quality="52.33"<br>/MQRankSum="-5.739"<br>/QD="7.46"<br>/ReadPosRankSum="2.685"<br>/SOR="1.079"<br>/Genotype="0/1"<br>/AD="488,200"<br>/Sample_Depth=688<br>/Genotype_Quality=99<br>/PL="5163,0,17376"                 |
| 1243648                  | /Reference_Nucleotide(s)="G"<br>/Variant_Nucleotide(s)="A"<br>/Change="G -> A"<br>/Polymorphism_Type="Substitution"<br>/Qual="720.77"<br>/Failed_Filters="MQRankSumLow;QDFilter"<br>/Allele_count=1<br>/Allele_frequency="0.5"<br>/Number_of_alleles=2<br>/BaseQRankSum="-6.455"<br>/ClippingRankSum="0.000"<br>/Combined_Depth=971<br>/ExcessHet="3.0103"<br>/FS="47.951"<br>/MLEAC=1<br>/MLEAF="0.5"<br>/Mapping_quality="58.43"<br>/MQRankSum="-29.608"<br>/QD="0.74"<br>/ReadPosRankSum="-2.724"<br>/SOR="6.617"<br>/Genotype="0/1"<br>/AD="888,83"<br>/Sample_Depth=971<br>/Genotype_Quality=99<br>/PL="749,0,37701" |
| 1243650                  | /Reference_Nucleotide(s)="G"<br>/Variant_Nucleotide(s)="A"<br>/Change="G -> A"<br>/Polymorphism_Type="Substitution"<br>/Qual="720.77"<br>/Failed_Filters="MQRankSumLow;QDFilter"<br>/Allele_count=1<br>/Allele_frequency="0.5"<br>/Number_of_alleles=2<br>/BaseQRankSum="3.239"<br>/ClippingRankSum="0.000"<br>/Combined_Depth=975<br>/ExcessHet="3.0103"<br>/FS="47.769"<br>/MLEAC=1<br>/MLEAF="0.5"<br>/Mapping_quality="58.46"<br>/MQRankSum="-29.838"<br>/QD="0.74"<br>/ReadPosRankSum="-3.160"<br>/SOR="7.403"<br>/Genotype="0/1"<br>/AD="893,81"<br>/Sample_Depth=974<br>/Genotype_Quality=99<br>/PL="749,0,37701"  |

```

sequence1 - 23S rRNA   TAAGCCGAGTCCGAAATGGGAAGGTGATGGCAAATGGAAATATTCCAATACCGACTAT
NC_011333 - 23S rRNA 2 TAAGCCGAGTCCGAAAGGGGAGGTGATGGCAAATTGGTTAATATTCCAATACCGACTAT

```

Figure S1. Position of SNPs detected (T1495A, T1494A, T1490A, T1476A, G1472T) via WGS in Mutant 1 strain.

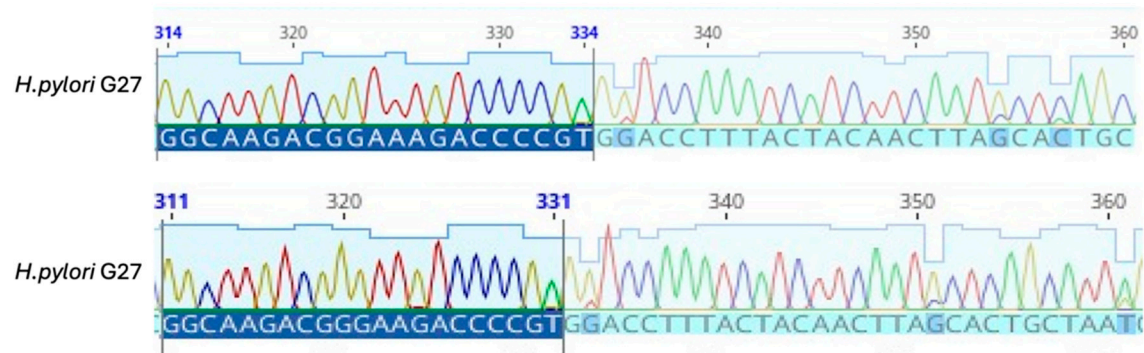

Figure S2: Signal decreases observed in Sanger sequence analysis are thought to be due to potential methylations occurring in the 23S rRNA region, leading to breaks.
